# Supplementary material for: Meta-Analysis of Factor V, Factor VII, Factor XII, and Factor XIII-A Gene Polymorphisms and Ischemic Stroke
Source: MDPI journal article supplement (doi:10.3390/medicina55040101), 2019-04-11
Supplement: s1 [file s1]

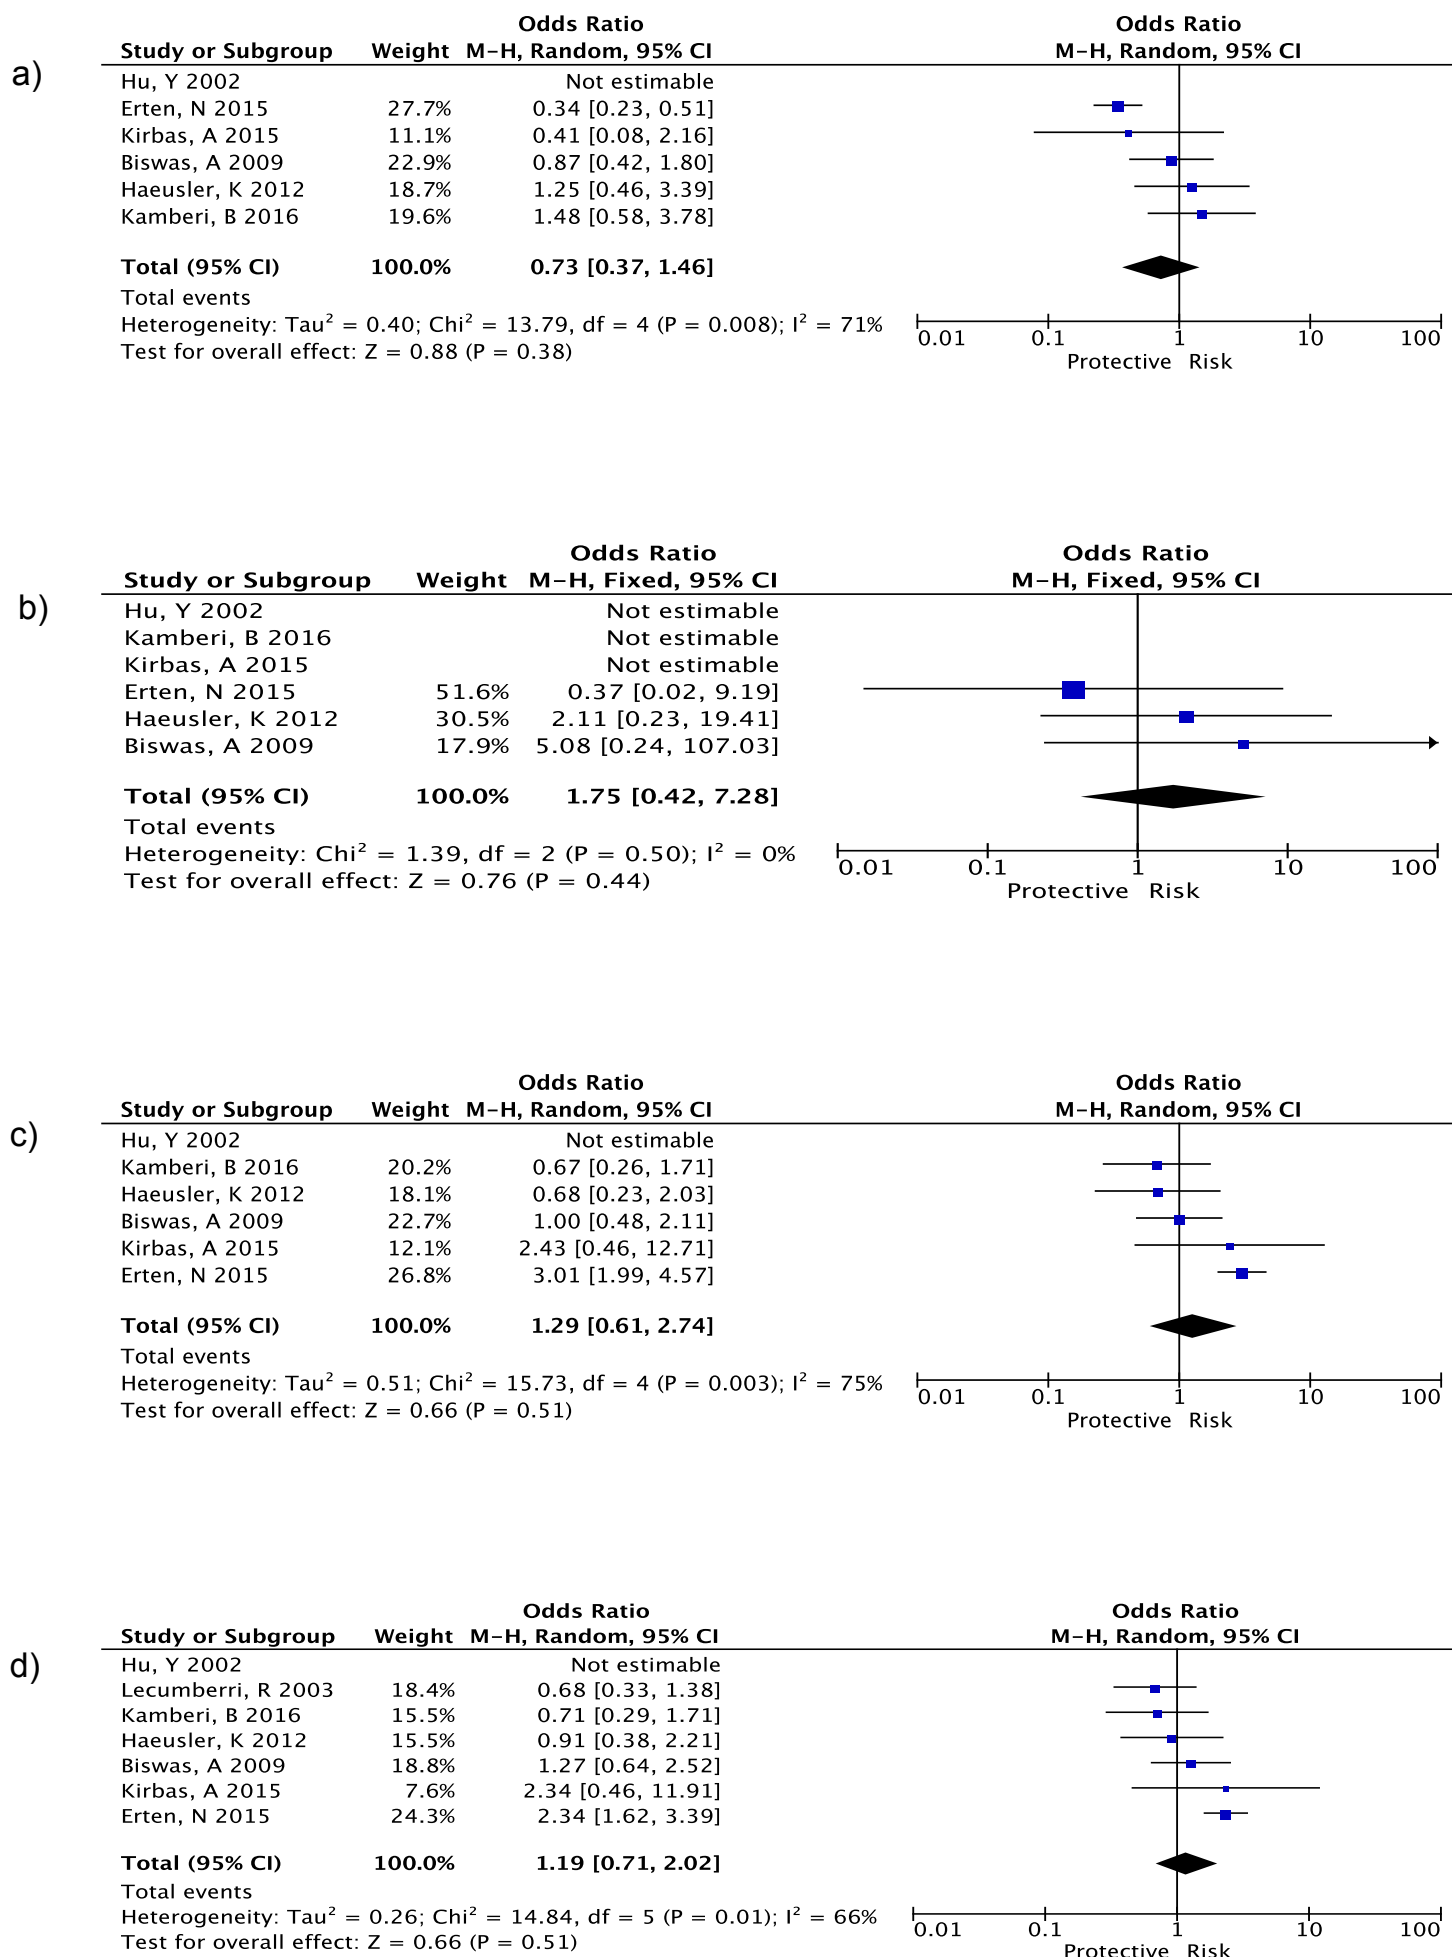

Supplementary Figure 1: Forest plots of the association between FV rs1800595 and ischemic stroke risk, under (a) dominant, (b) recessive, (c) over-dominant, and (d) allelic models.

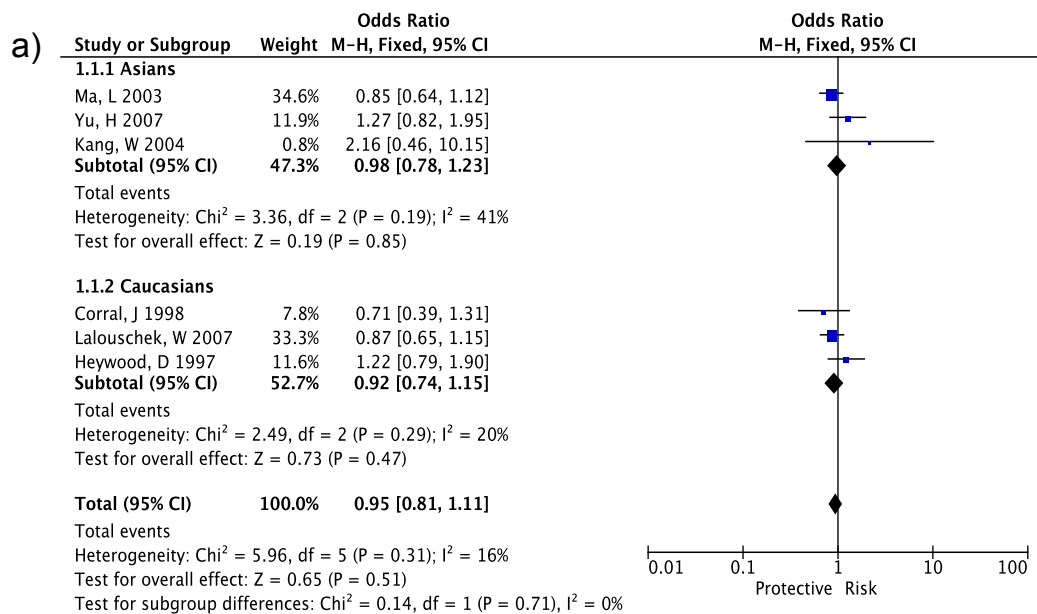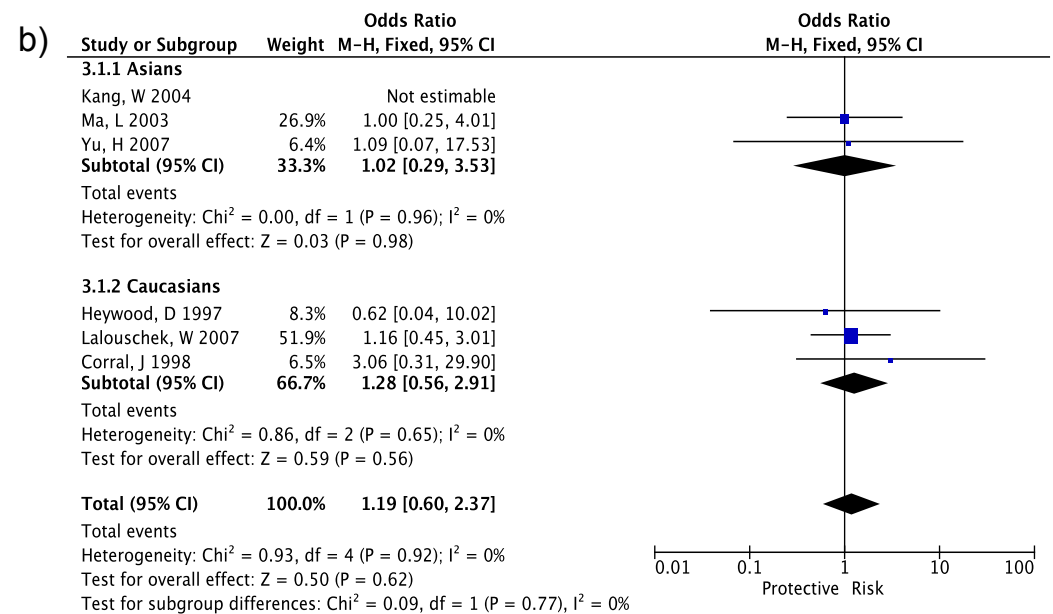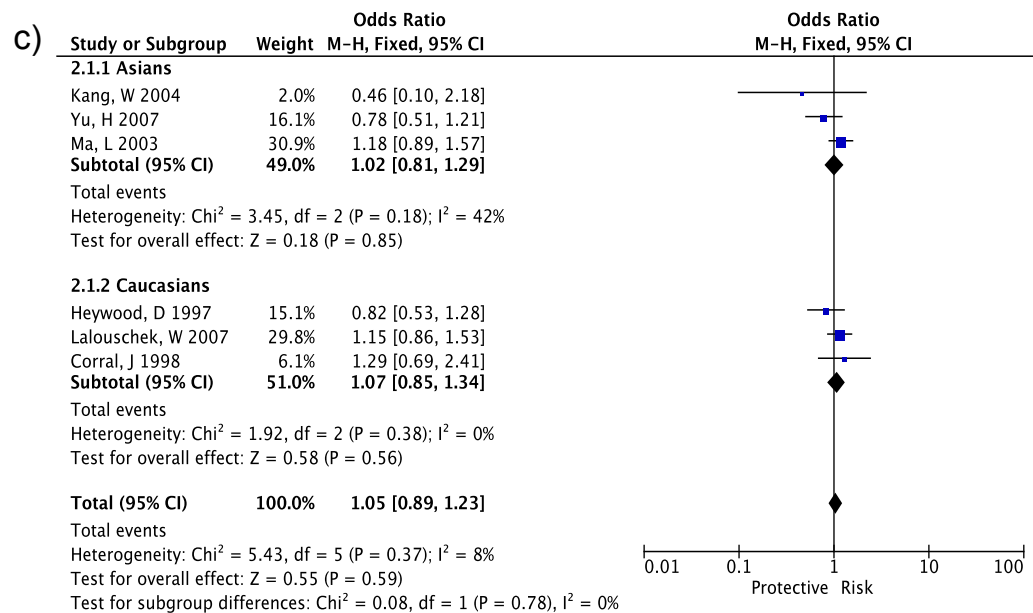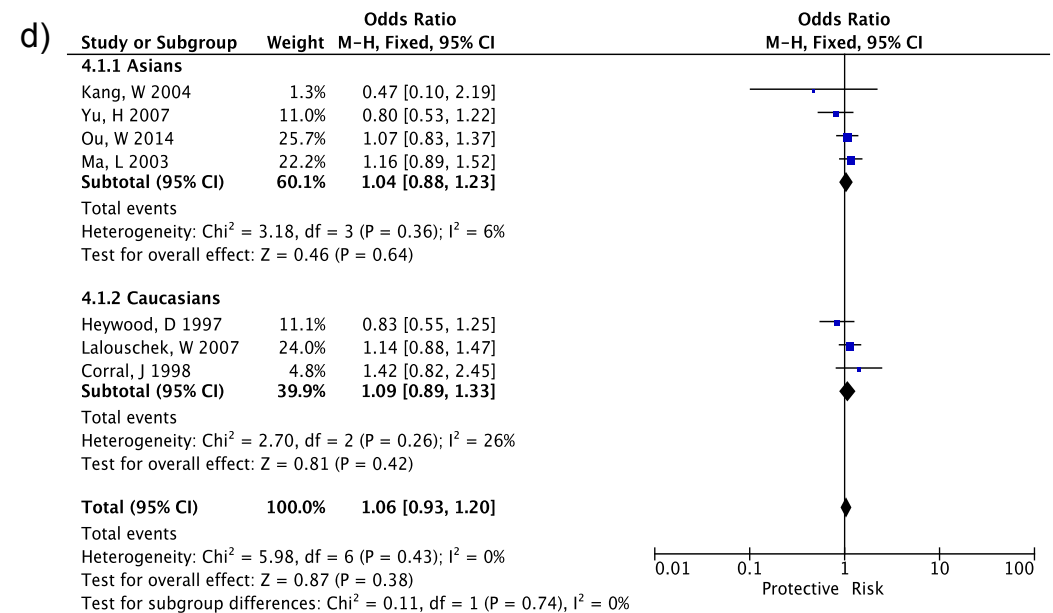

Supplementary Figure 2: Forest plots of the association between FVII rs5742910 and ischemic stroke risk, under (a) dominant, (b) recessive, (c) over-dominant, and (d) allelic models.

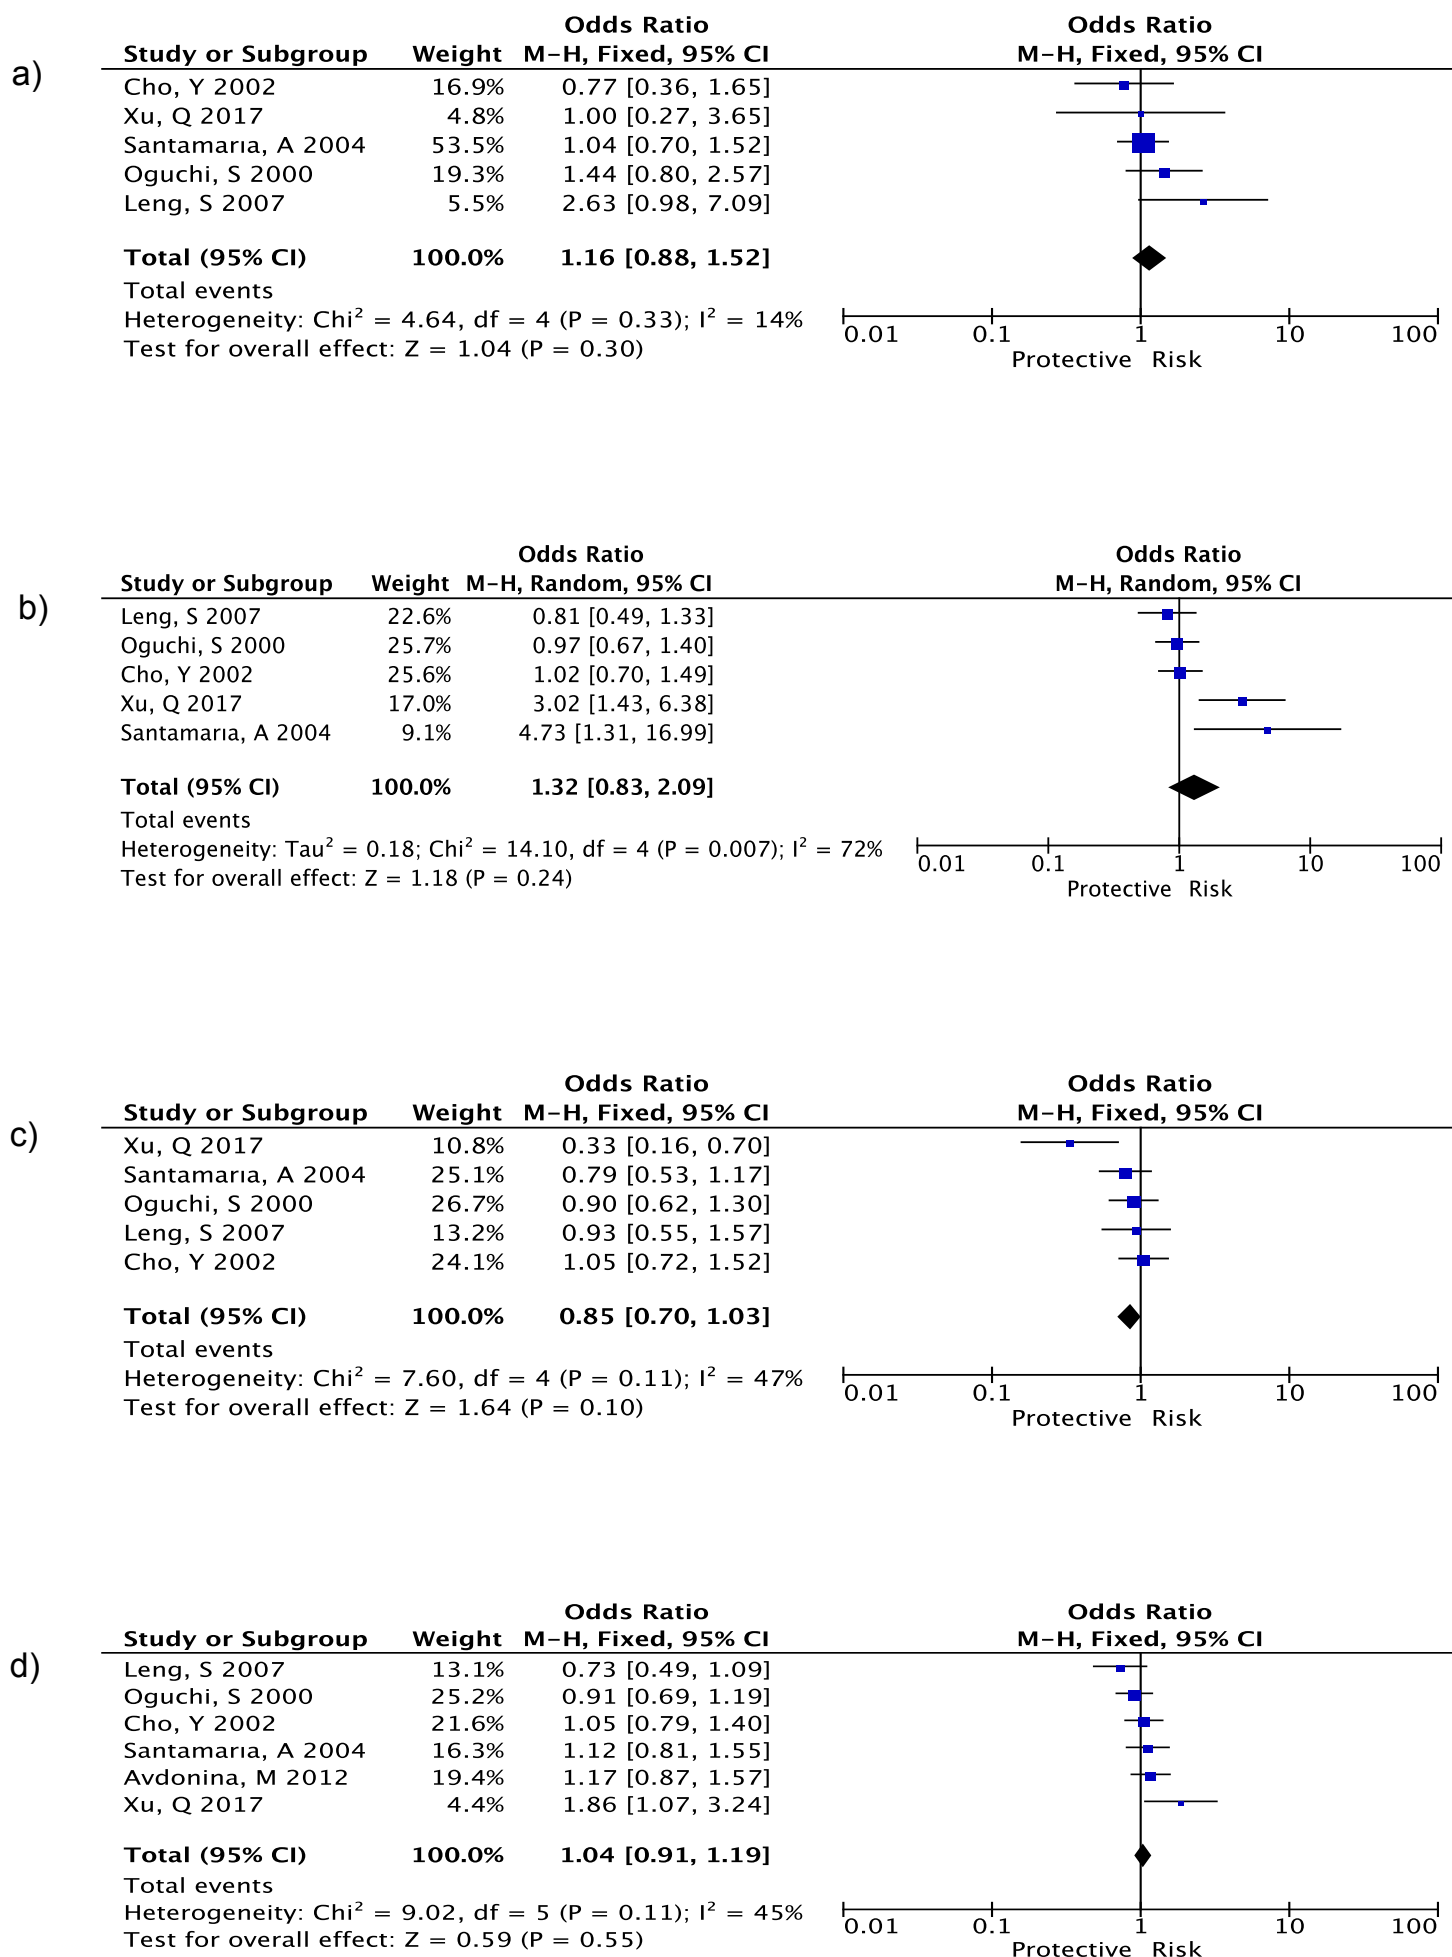

Supplementary Figure 3: Forest plots of the association between FXII rs1801020 and ischemic stroke risk, under (a) dominant, (b) recessive, (c) over-dominant, and (d) allelic models.

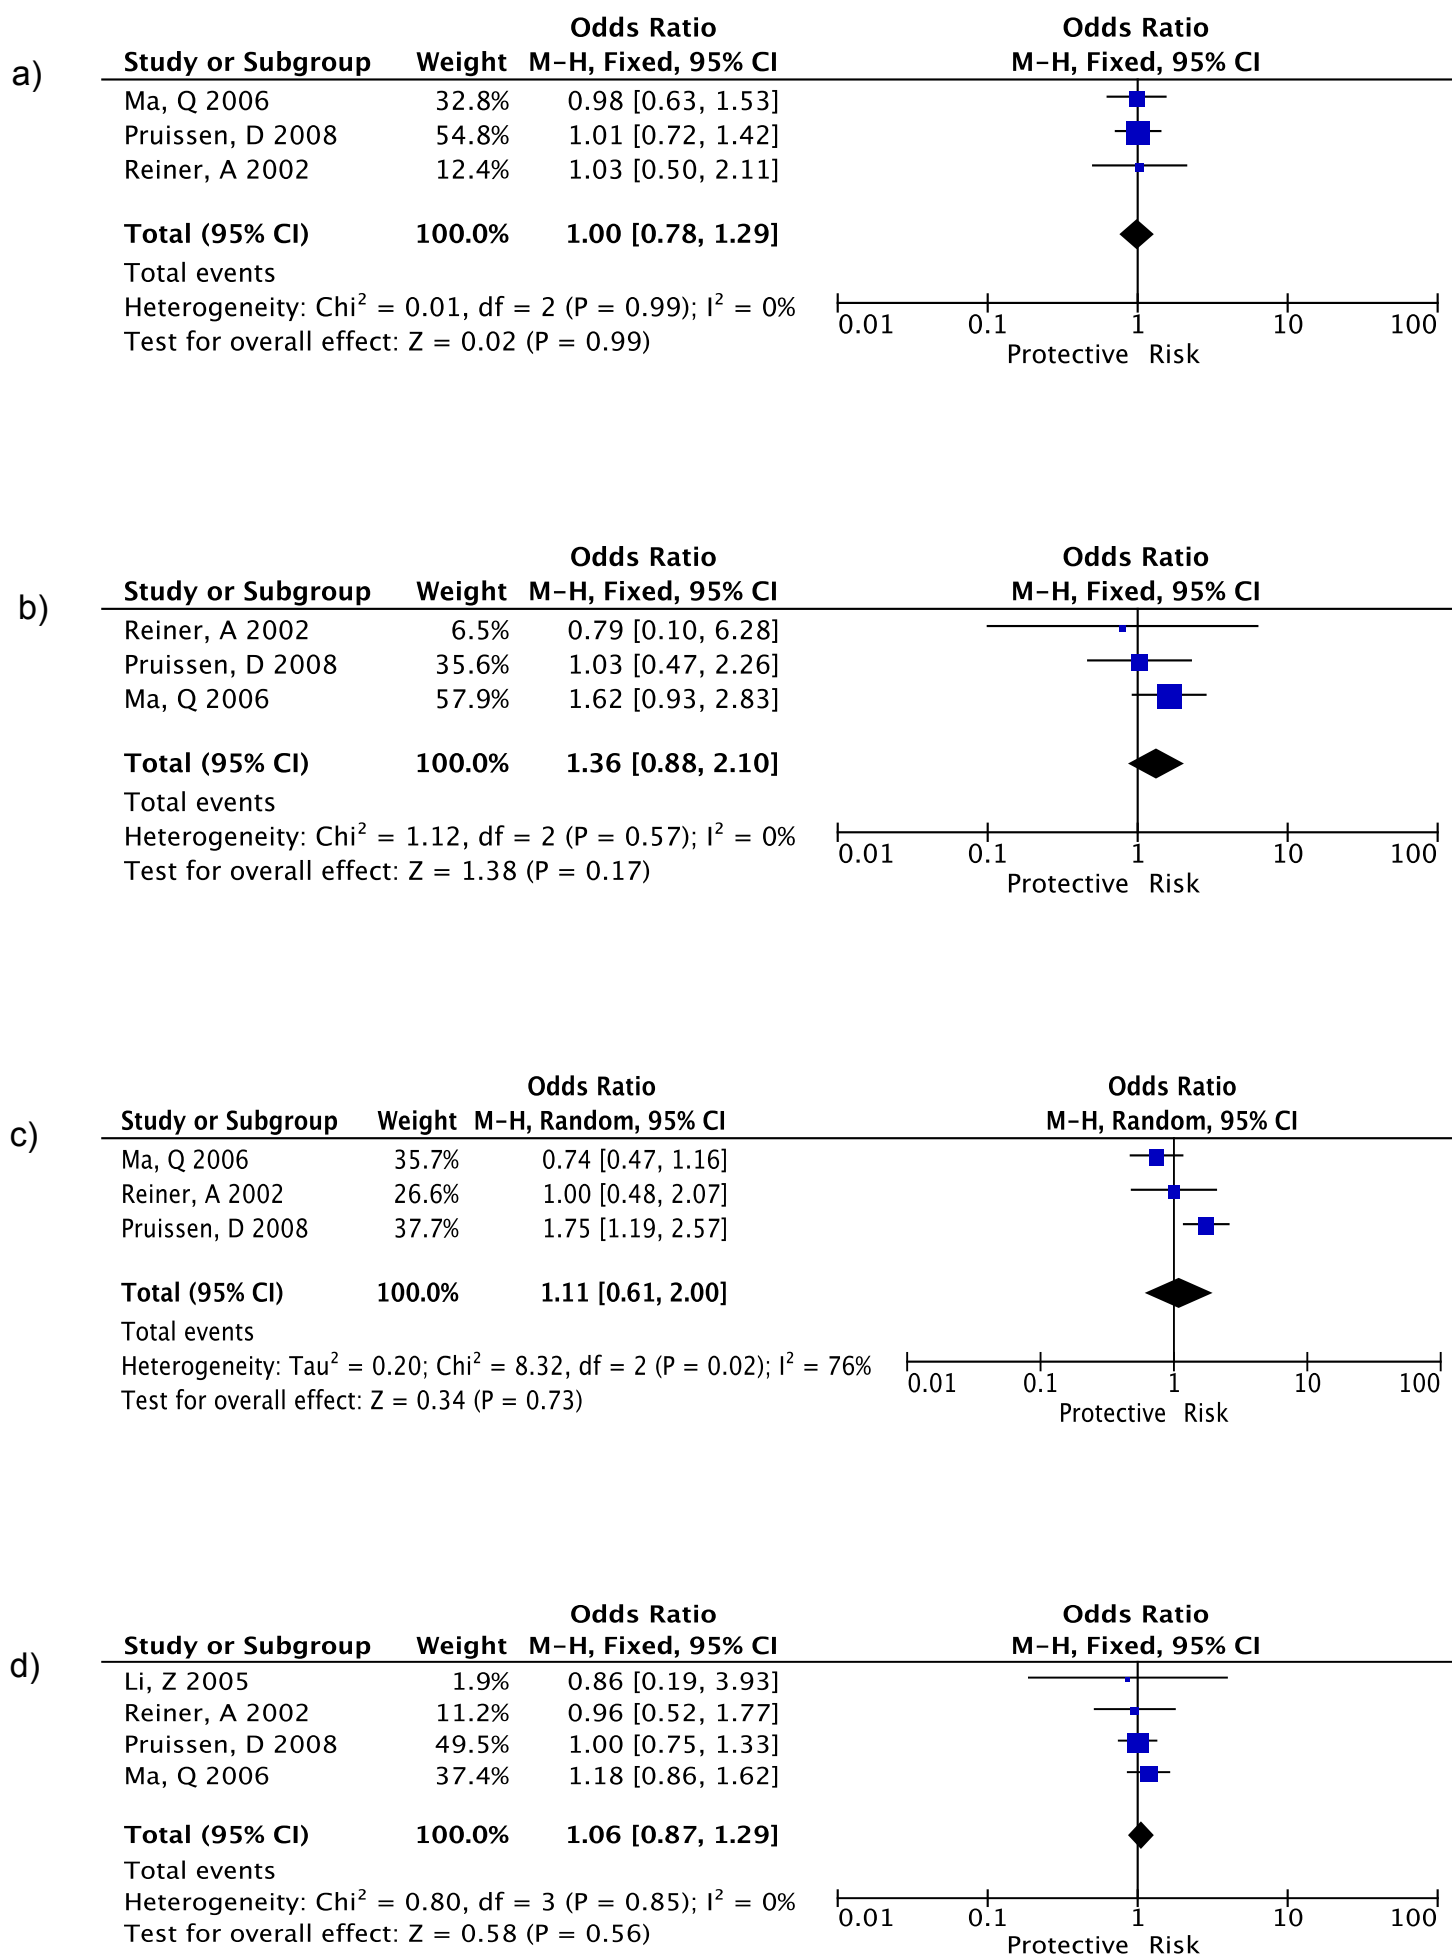

Supplementary Figure 4: Forest plots of the association between FXIII-A rs5982 and ischemic stroke risk, under (a) dominant, (b) recessive, (c) over-dominant, and (d) allelic models.

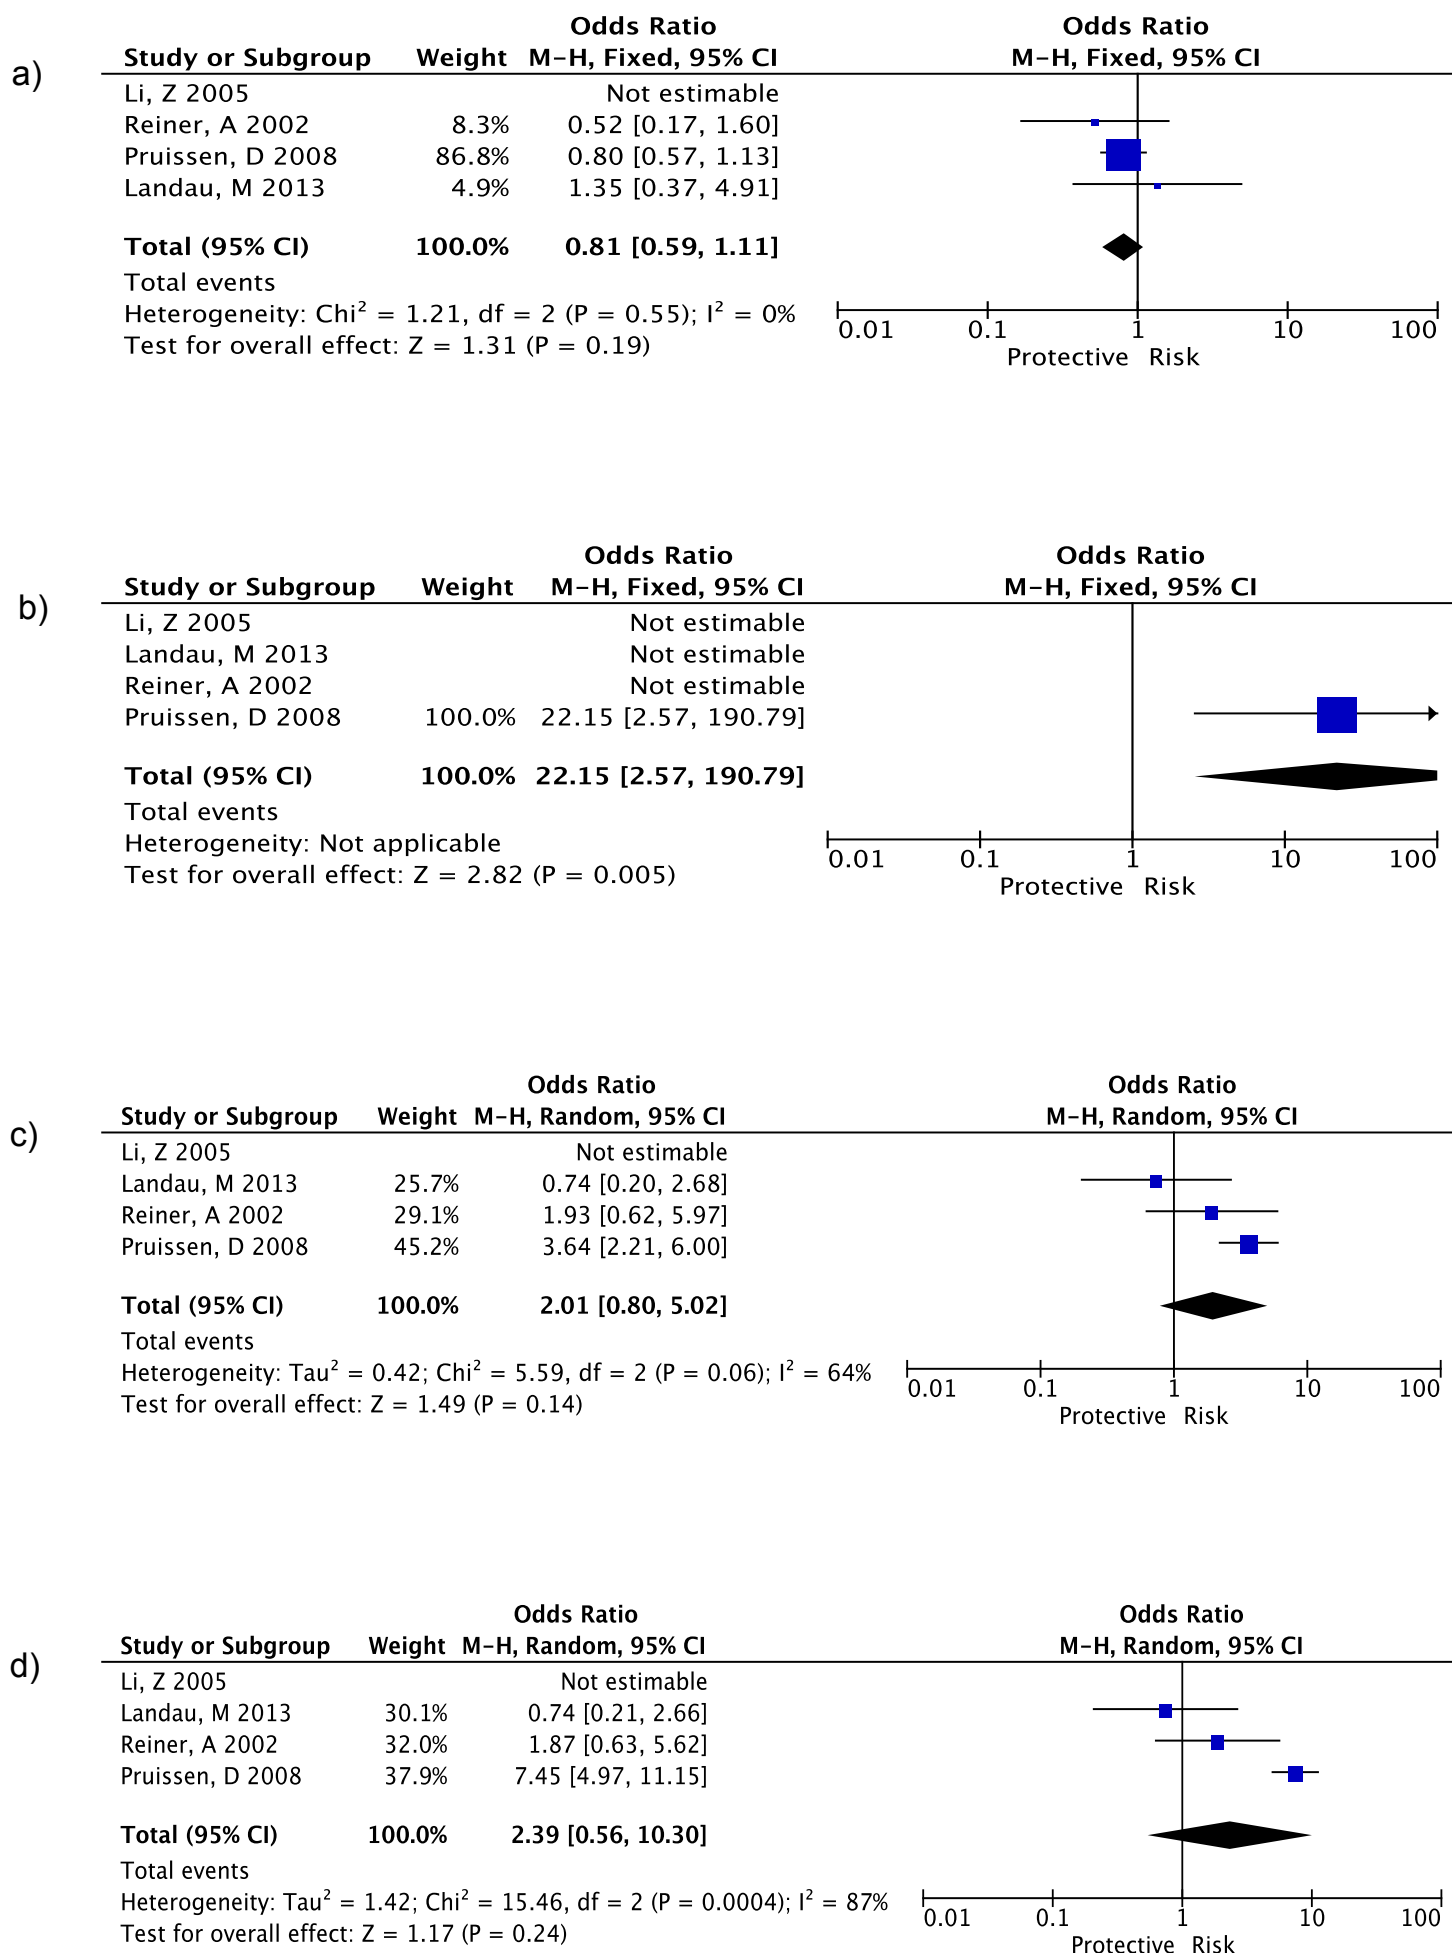

Supplementary Figure 5: Forest plots of the association between FXIII-A rs3024477 and ischemic stroke risk, under (a) dominant, (b) recessive, (c) over-dominant, and (d) allelic models.

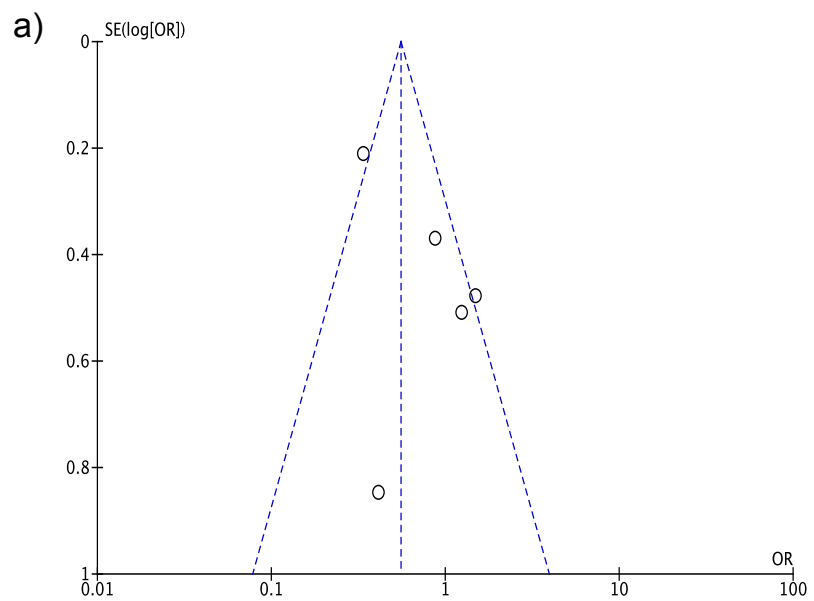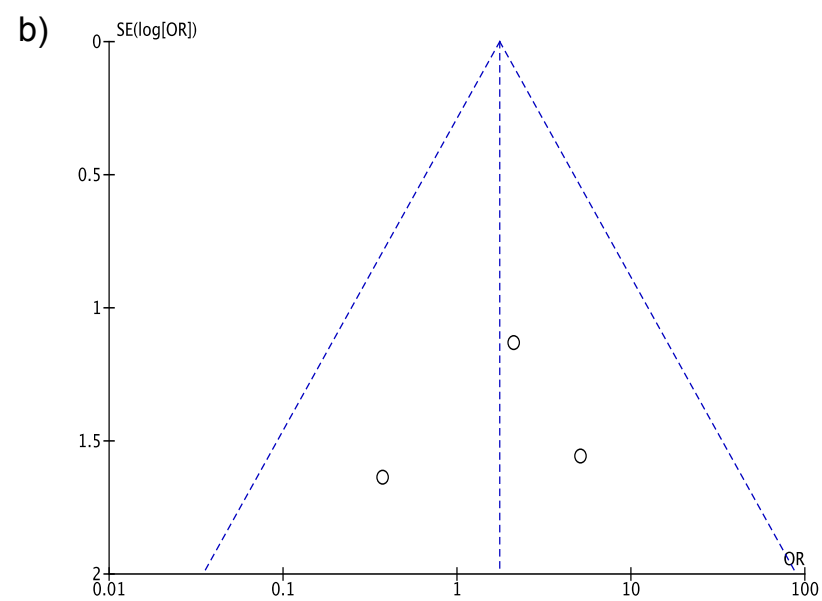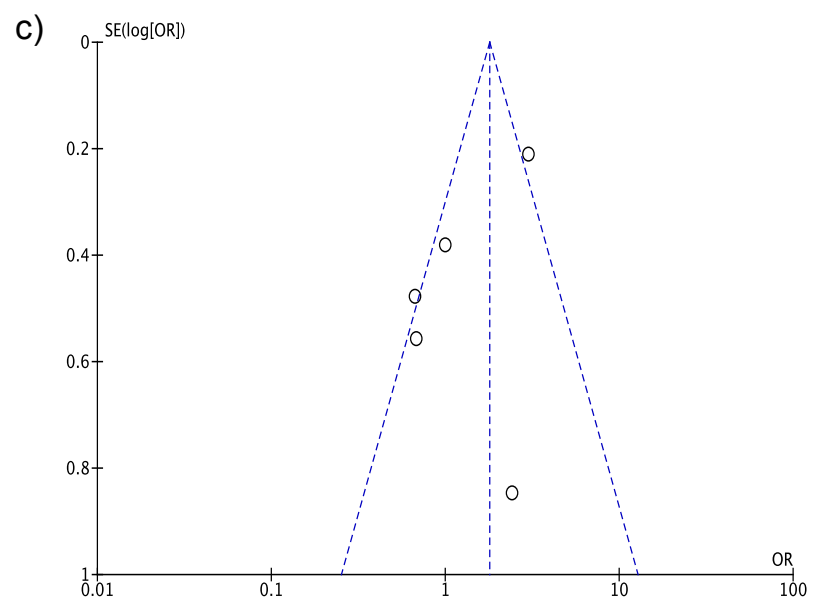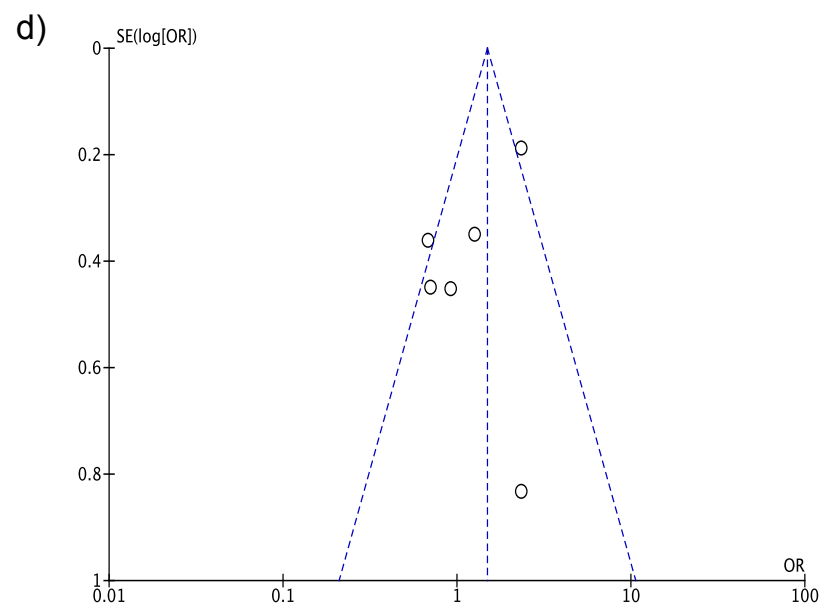

Supplementary Figure 6: Funnel plots of the association between FV rs1800595 and ischemic stroke risk, under (a) dominant, (b) recessive, (c) over-dominant, and (d) allelic models.

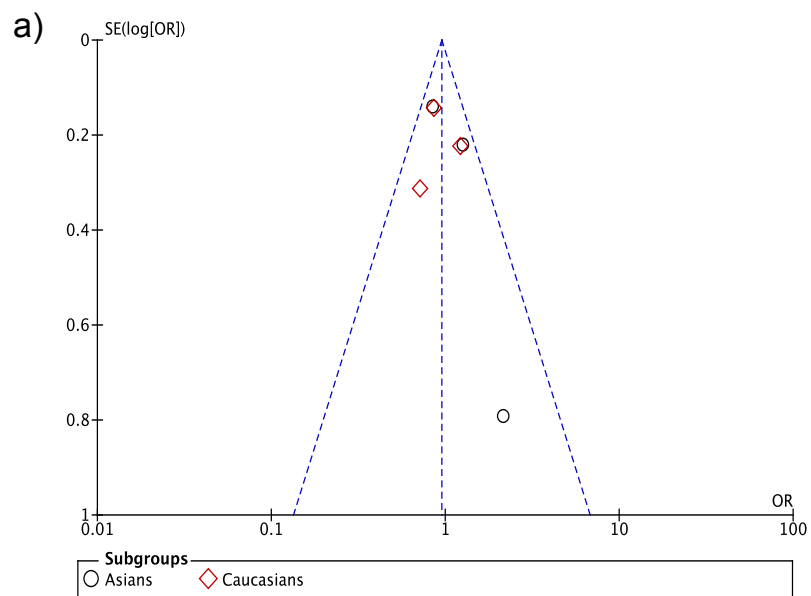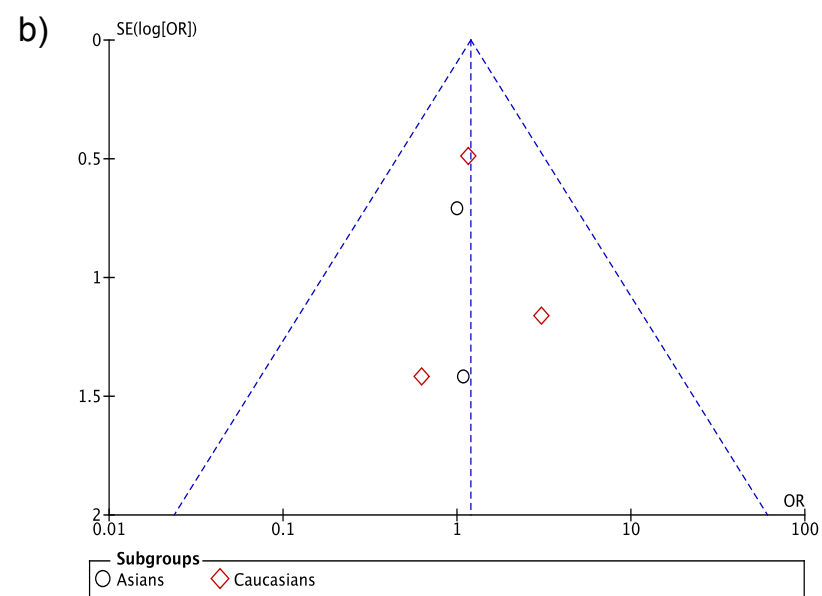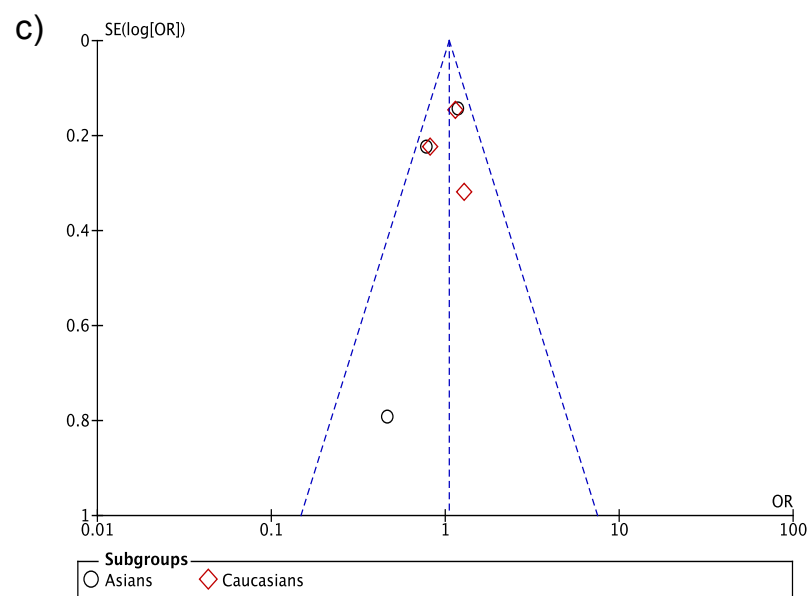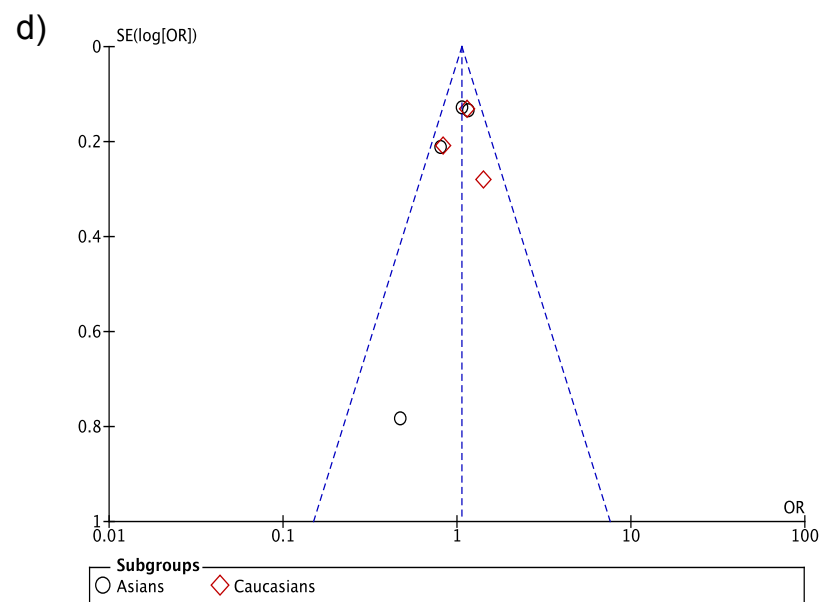

Supplementary Figure 7: Funnel plots of the association between FVII rs5742910 and ischemic stroke risk, under (a) dominant, (b) recessive, (c) over-dominant, and (d) allelic models.

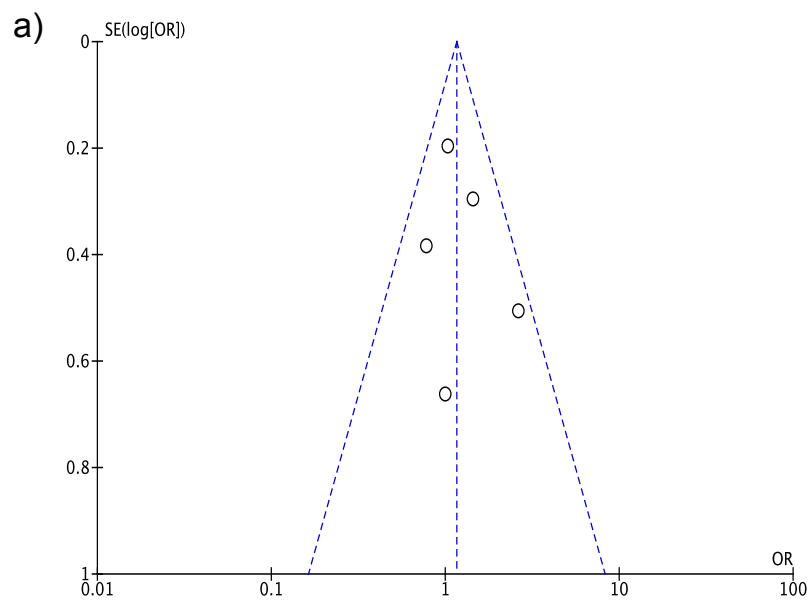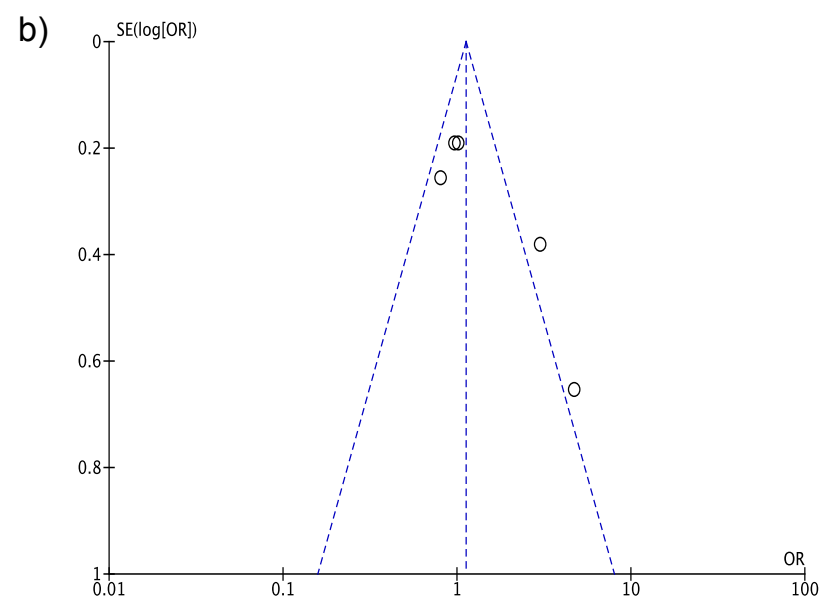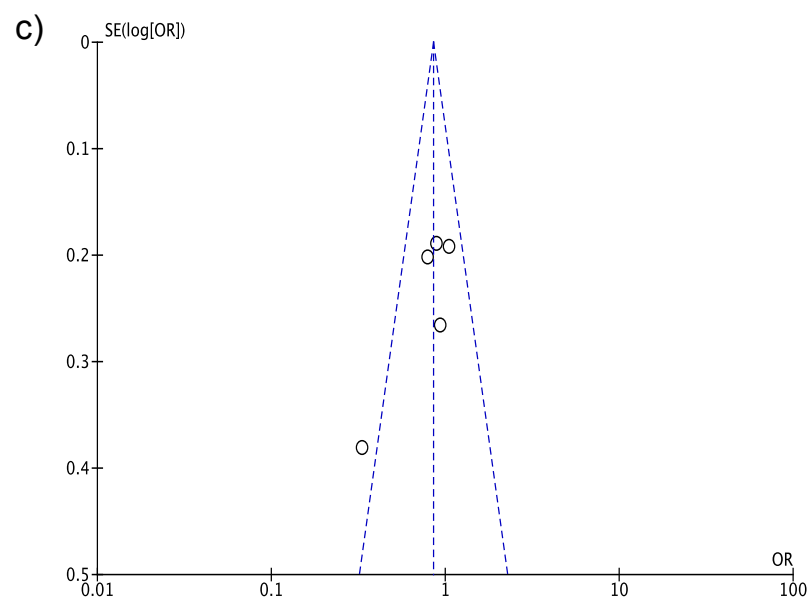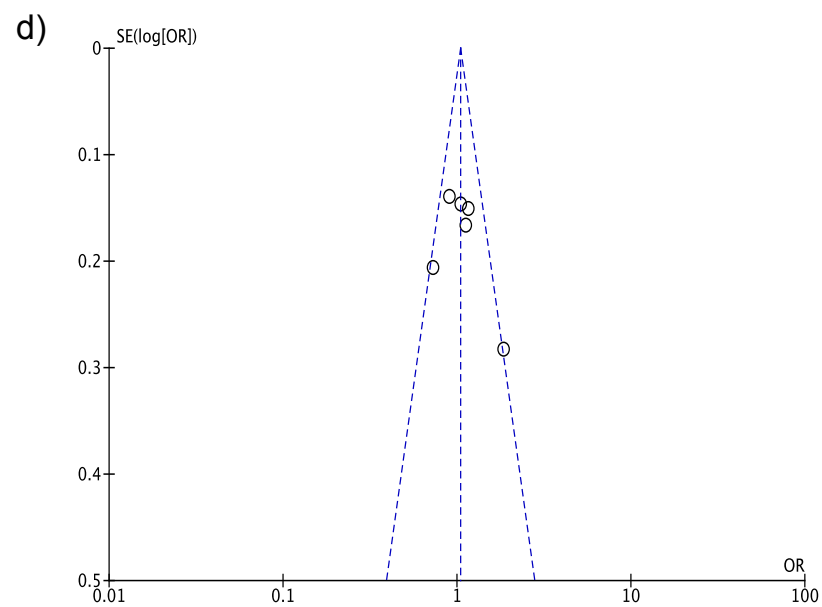

Supplementary Figure 8: Funnel plots of the association between FXII rs1801020 and ischemic stroke risk, under (a) dominant, (b) recessive, (c) over-dominant, and (d) allelic models.



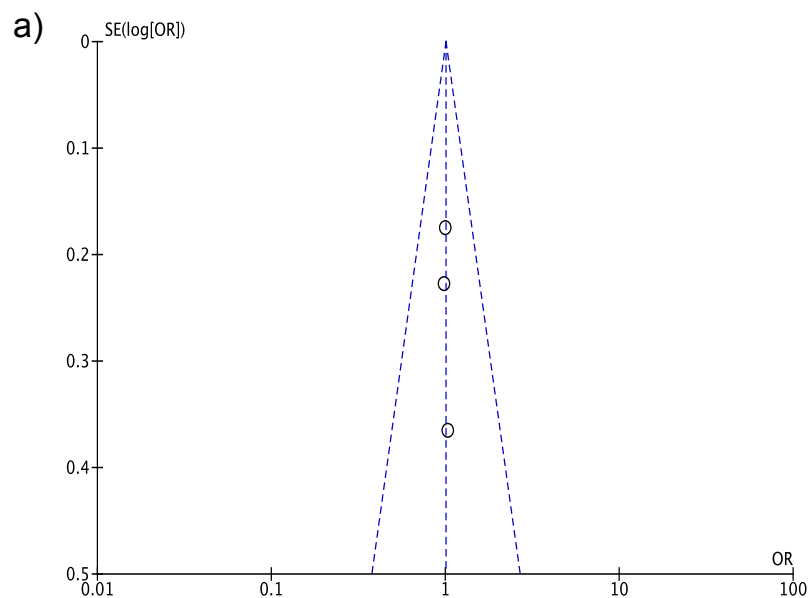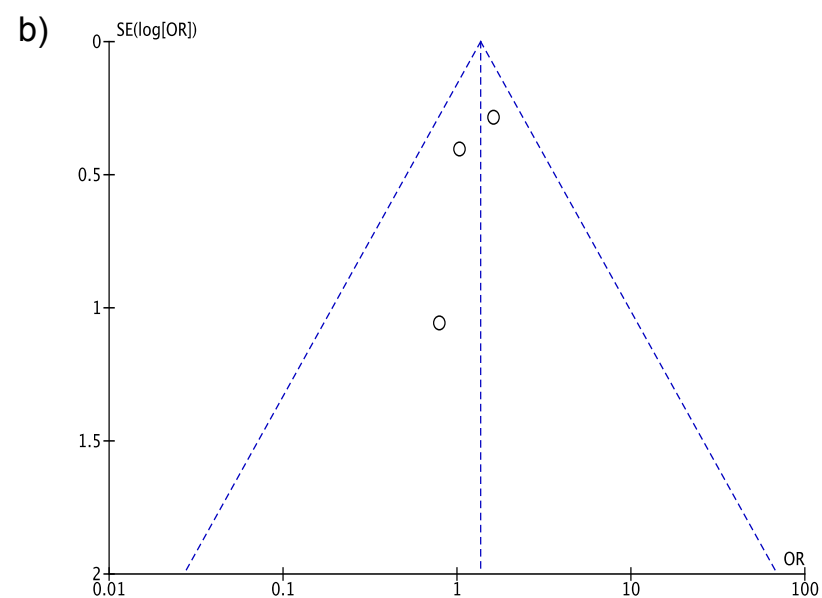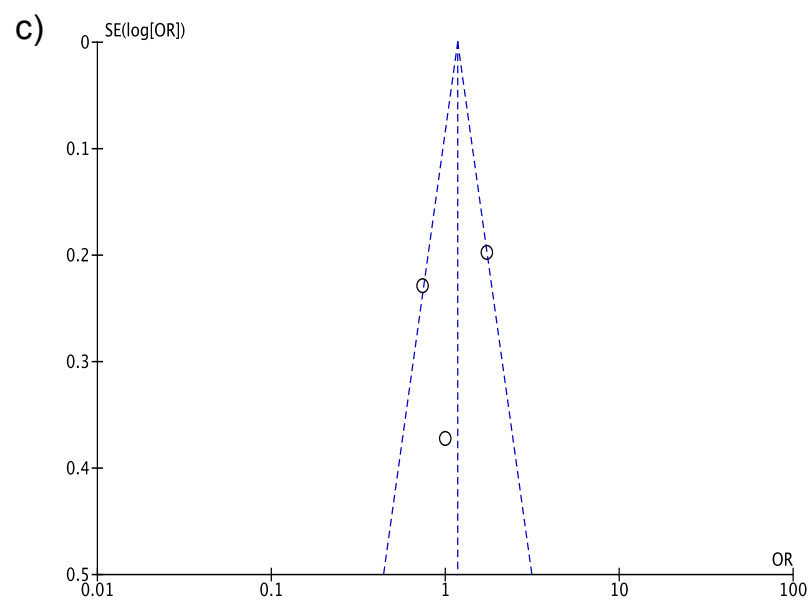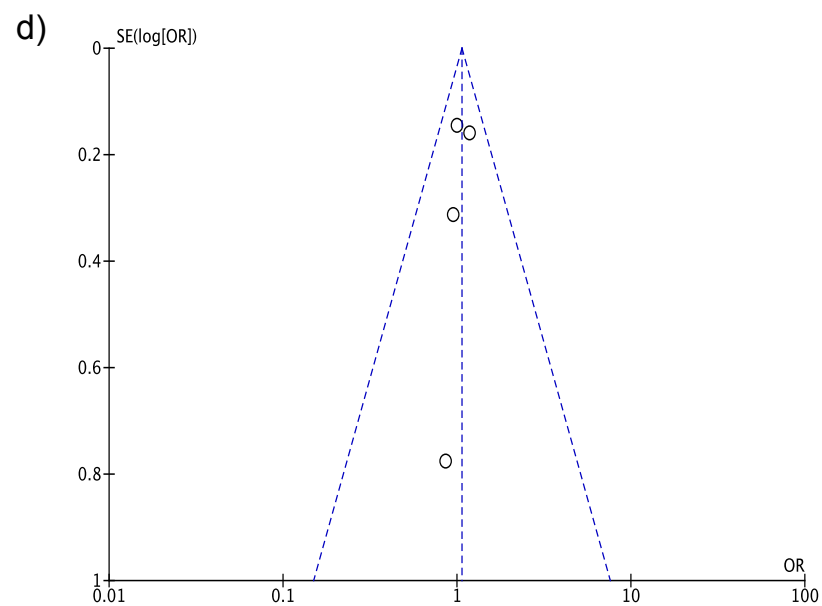

Supplementary Figure 9: Funnel plots of the association between FXIII-A rs5982 and ischemic stroke risk, under (a) dominant, (b) recessive, (c) over-dominant, and (d) allelic models.

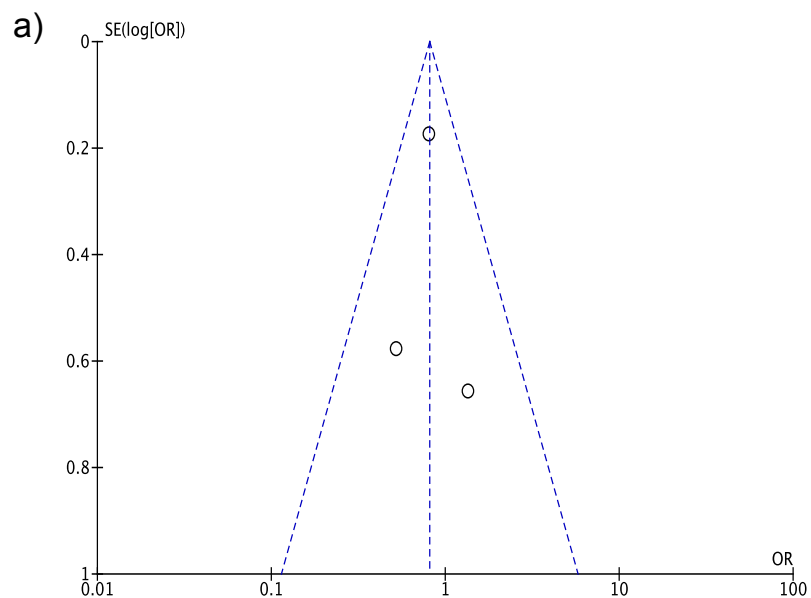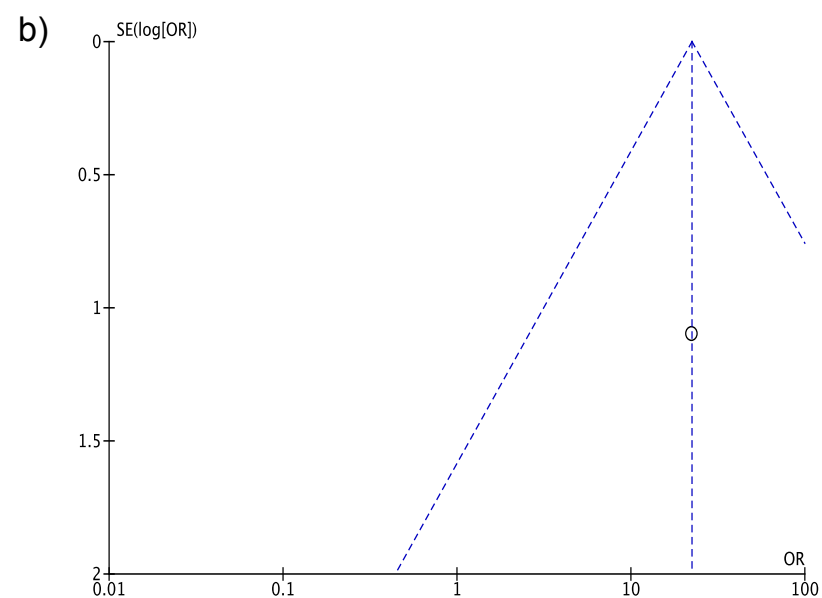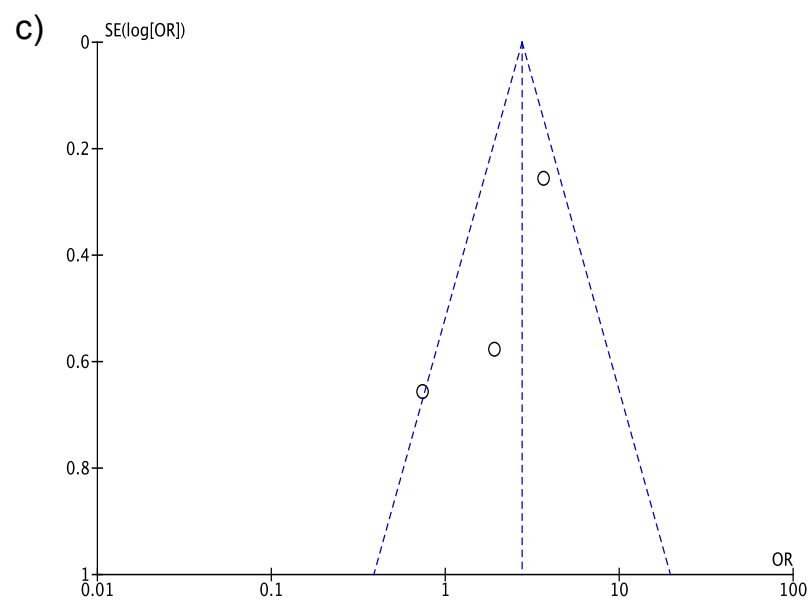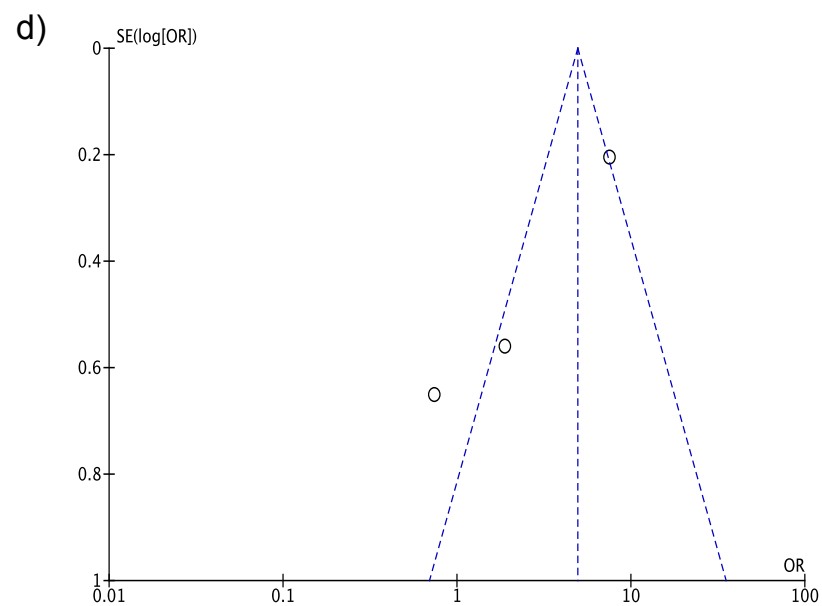

Supplementary Figure 10: Funnel plots of the association between FXIII-A rs3024477 and ischemic stroke risk, under (a) dominant, (b) recessive, (c) over-dominant, and (d) allelic models.
